# Supplementary material for: Environmental Impacts on Skin Microbiomes of Sympatric High Arctic Salmonids
Source: MDPI journal article supplement (doi:10.3390/fishes8040214), 2023-04-18
Supplement: s1 [file s1]

Supplemental Material

# Environmental impacts on skin microbiomes of sympatric high Arctic salmonids

## Supplemental Tables

**Table S1.** SIMPER analysis, showing Arctic char skin microbial ASVs labelled to the lowest assigned taxonomic rank along with their respective phyla, in brackets, corresponding to the ASVs responsible for the top 30% of dissimilarity (or alternatively the top 20 ASVs if there are more than 20 taxa in the top 30%) between pairwise-comparisons of seasonal habitats.

| Salinity (Overall Average Dissimilarity 99.2%)                     |                      |                     |                       |                  |                |
|--------------------------------------------------------------------|----------------------|---------------------|-----------------------|------------------|----------------|
| Taxa                                                               | Saline (%)           | Fresh (%)           | Average Dissimilarity | Contribution (%) | Cumulative (%) |
| <i>Photobacterium</i> (Proteobacteria)                             | 19.2                 | 0.03                | 9.6                   | 9.7              | 9.7            |
| <i>Tychonema</i> CCAP 1459-11B<br>(Cyanobacteria)                  | 9.9                  | 0.0001              | 5                     | 5                | 14.7           |
| <i>Rivularia</i> PCC-7116 (Cyanobacteria)                          | 6.6                  | 0.004               | 3.3                   | 3.3              | 18             |
| <i>Carnobacterium maltaromaticum</i><br>(Firmicutes)               | 5.2                  | 0.04                | 2.6                   | 2.6              | 20.7           |
| <i>Psychrobacter</i> (Proteobacteria)                              | 3.1                  | 0.9                 | 1.9                   | 1.9              | 22.6           |
| <i>Aliivibrio</i> (Proteobacteria)                                 | 3.3                  | 0.001               | 1.6                   | 1.6              | 24.2           |
| <i>Cyanobium</i> PCC-6307 (Cyanobacteria)                          | 2.8                  | 0.04                | 1.4                   | 1.4              | 25.6           |
| <i>Staphylococcus</i> (Firmicutes)                                 | 0.9                  | 1.6                 | 1.2                   | 1.2              | 26.8           |
| <i>Escherichia-Shigella</i> (Proteobacteria)                       | 0                    | 2.3                 | 1.1                   | 1.1              | 27.9           |
| <i>Psychrobacter</i> (Proteobacteria)                              | 1                    | 1.2                 | 1.1                   | 1.1              | 29             |
| Oxalobacteraceae (Proteobacteria)                                  | 0.08                 | 1.7                 | 0.9                   | 0.9              | 29.9           |
| Autumn Saline – Autumn Fresh (Overall Average Dissimilarity 98.8%) |                      |                     |                       |                  |                |
| Taxa                                                               | Autumn Saline<br>(%) | Autumn Fresh<br>(%) | Average Dissimilarity | Contribution (%) | Cumulative (%) |

|                                                      |      |       |     |     |      |
|------------------------------------------------------|------|-------|-----|-----|------|
| <i>Photobacterium</i> (Proteobacteria)               | 19.2 | 0.05  | 9.6 | 9.7 | 9.7  |
| <i>Tychonema</i> CCAP 1459-11B<br>(Cyanobacteria)    | 9.9  | 0     | 5.0 | 5   | 14.7 |
| <i>Escherichia-Shigella</i> (Proteobacteria)         | 0    | 6.8   | 3.4 | 3.4 | 18.2 |
| <i>Rivularia</i> PCC-7116 (Cyanobacteria)            | 6.6  | 0.003 | 3.3 | 3.4 | 21.5 |
| <i>Carnobacterium maltaromaticum</i><br>(Firmicutes) | 5.2  | 0.06  | 2.6 | 2.7 | 24.2 |
| <i>Psychrobacter</i> (Proteobacteria)                | 3.1  | 2.3   | 2.5 | 2.5 | 26.7 |
| Cyanobacteria                                        | 0    | 4.2   | 2.1 | 2.1 | 28.8 |
| <i>Aliivibrio</i> (Proteobacteria)                   | 3.3  | 0.002 | 1.6 | 1.7 | 30.4 |

---

Autumn Saline – Winter Fresh (Overall Average Dissimilarity 99.2%)

---

| Taxa                                                   | Autumn Saline<br>(%) | Winter Fresh<br>(%) | Average Dissimilarity | Contribution (%) | Cumulative (%) |
|--------------------------------------------------------|----------------------|---------------------|-----------------------|------------------|----------------|
| <i>Photobacterium</i> (Proteobacteria)                 | 19.2                 | 0.04                | 9.6                   | 9.7              | 9.7            |
| <i>Tychonema</i> CCAP 1459-11B<br>(Cyanobacteria)      | 9.9                  | 0                   | 5.0                   | 5                | 14.7           |
| <i>Staphylococcus</i> (Firmicutes)                     | 0.05                 | 7.3                 | 3.6                   | 3.7              | 18.3           |
| <i>Rivularia</i> PCC-7116 (Cyanobacteria)              | 6.6                  | 0                   | 3.3                   | 3.3              | 21.7           |
| <i>Planoglabratella opercularis</i><br>(Cyanobacteria) | 0                    | 6.5                 | 3.2                   | 3.3              | 25.0           |
| <i>Psychrobacter</i> (Proteobacteria)                  | 1                    | 5.03                | 2.9                   | 2.9              | 27.8           |
| <i>Carnobacterium maltaromaticum</i><br>(Firmicutes)   | 5.2                  | 0.04                | 2.6                   | 2.6              | 30.5           |

---

Autumn Saline – Spring Fresh (Overall Average Dissimilarity 99.5%)

---

| Taxa                                                              | Autumn Saline (%) | Spring Fresh (%) | Average Dissimilarity | Contribution (%) | Cumulative (%) |
|-------------------------------------------------------------------|-------------------|------------------|-----------------------|------------------|----------------|
| <i>Photobacterium</i> (Proteobacteria)                            | 19.2              | 0.008            | 9.6                   | 9.7              | 9.7            |
| <i>Tychonema</i> CCAP 1459-11B<br>(Cyanobacteria)                 | 9.9               | 0.0003           | 5.0                   | 5                | 14.6           |
| <i>Rivularia</i> PCC-7116 (Cyanobacteria)                         | 6.6               | 0.006            | 3.3                   | 3.3              | 18.0           |
| <i>Carnobacterium maltaromaticum</i><br>(Firmicutes)              | 5.2               | 0.01             | 2.6                   | 2.6              | 20.6           |
| Oxalobacteraceae (Proteobacteria)                                 | 0.08              | 3.6              | 1.8                   | 1.8              | 22.4           |
| <i>Aliivibrio</i> (Proteobacteria)                                | 3.3               | 0.001            | 1.6                   | 1.6              | 24.03          |
| <i>Psychrobacter</i> (Proteobacteria)                             | 3.1               | 0.05             | 1.6                   | 1.6              | 25.6           |
| <i>Cyanobium</i> PCC-6307 (Cyanobacteria)                         | 2.8               | 0.01             | 1.4                   | 1.4              | 27.01          |
| <i>Staphylococcus</i> (Firmicutes)                                | 0.9               | 1.8              | 1.3                   | 1.3              | 28.3           |
| <i>Aquabacterium</i> (Proteobacteria)                             | 0.006             | 2.5              | 1.3                   | 1.3              | 29.6           |
| <i>Massilia</i> (Proteobacteria)                                  | 0.009             | 1.9              | 0.9                   | 0.9              | 30.5           |
| Autumn Fresh – Winter Fresh (Overall Average Dissimilarity 98.7%) |                   |                  |                       |                  |                |
| Taxa                                                              | Autumn Fresh (%)  | Winter Fresh (%) | Average Dissimilarity | Contribution (%) | Cumulative (%) |
| <i>Staphylococcus</i> (Firmicutes)                                | 0.009             | 7.3              | 3.6                   | 3.7              | 3.7            |
| <i>Escherichia-Shigella</i> (Proteobacteria)                      | 6.8               | 0                | 3.4                   | 3.4              | 7.1            |
| <i>Planoglabratella opercularis</i><br>(Cyanobacteria)            | 0.002             | 6.5              | 3.2                   | 3.3              | 10.4           |
| <i>Psychrobacter</i> (Proteobacteria)                             | 0.6               | 5.03             | 2.7                   | 2.8              | 13.2           |
| Cyanobacteria                                                     | 4.2               | 0.006            | 2.08                  | 2.1              | 15.3           |
| <i>Staphylococcus</i> (Firmicutes)                                | 0.3               | 3.3              | 1.7                   | 1.7              | 17             |

| <i>Acinetobacter</i> (Proteobacteria)                             | 0                | 3                | 1.5                   | 1.5              | 18.5           |
|-------------------------------------------------------------------|------------------|------------------|-----------------------|------------------|----------------|
| Gemmataceae (Planctomycetota)                                     | 1.2              | 1.9              | 1.4                   | 1.4              | 19.9           |
| <i>Psychrobacter</i> (Proteobacteria)                             | 2.3              | 0.5              | 1.3                   | 1.3              | 21.2           |
| <i>Carnobacterium inhibens</i> (Firmicutes)                       | 2.5              | 0.08             | 1.3                   | 1.3              | 22.5           |
| <i>Psychrobacter</i> (Proteobacteria)                             | 0.02             | 1.9              | 1                     | 1                | 23.5           |
| <i>Cthoniobacter</i> (Verrucomicrobiota)                          | 1.7              | 0.07             | 0.9                   | 0.9              | 24.4           |
| <i>Acinetobacter</i> (Proteobacteria)                             | 0.3              | 1.4              | 0.8                   | 0.8              | 25.2           |
| <i>Psychrobacter</i> (Proteobacteria)                             | 0.2              | 1.4              | 0.7                   | 0.8              | 26             |
| Cyanobacteria                                                     | 0                | 1.5              | 0.7                   | 0.8              | 26.7           |
| <i>Luteolibacter</i> (Verrucomicrobiota)                          | 1.3              | 0.3              | 0.7                   | 0.7              | 27.4           |
| <i>Cyanobium</i> PCC-6307 (Cyanobacteria)                         | 1.3              | 0.02             | 0.7                   | 0.7              | 28.07          |
| <i>Luteolibacter</i> (Verrucomicrobiota)                          | 0.8              | 0.5              | 0.6                   | 0.6              | 28.7           |
| Cyanobacteria                                                     | 1.2              | 0.006            | 0.6                   | 0.6              | 29.3           |
| <i>Cyanobium</i> PCC-6307 (Cyanobacteria)                         | 1.2              | 0.002            | 0.6                   | 0.6              | 29.9           |
| Autumn Fresh – Spring Fresh (Overall Average Dissimilarity 97.9%) |                  |                  |                       |                  |                |
| Taxa                                                              | Autumn Fresh (%) | Spring Fresh (%) | Average Dissimilarity | Contribution (%) | Cumulative (%) |
| <i>Escherichia-Shigella</i> (Proteobacteria)                      | 6.8              | 0                | 3.4                   | 3.5              | 3.5            |
| Cyanobacteria                                                     | 4.2              | 0                | 2.07                  | 2.1              | 5.6            |
| <i>Oxalobacteraceae</i> (Proteobacteria)                          | 0.06             | 3.6              | 1.8                   | 1.8              | 7.4            |
| <i>Aquabacterium</i> (Proteobacteria)                             | 0.1              | 2.5              | 1.3                   | 1.3              | 8.7            |
| <i>Carnobacterium inhibens</i> (Firmicutes)                       | 2.5              | 0.004            | 1.3                   | 1.3              | 10             |
| <i>Psychrobacter</i> (Proteobacteria)                             | 2.3              | 0.05             | 1.2                   | 1.2              | 11.2           |
| <i>Massilia</i> (Proteobacteria)                                  | 0.05             | 1.9              | 0.9                   | 1                | 12.2           |

|                                                                            |      |      |     |     |      |
|----------------------------------------------------------------------------|------|------|-----|-----|------|
| <i>Staphylococcus</i> (Firmicutes)                                         | 0.3  | 1.8  | 0.9 | 0.9 | 13.1 |
| <i>Chthoniobacter</i> (Verrucomicrobiota)                                  | 1.7  | 0.09 | 0.8 | 0.9 | 14   |
| <i>Massilia</i> (Proteobacteria)                                           | 0.03 | 1.6  | 0.8 | 0.8 | 14.8 |
| <i>Gemmataceae</i> (Planctomycetota)                                       | 1.2  | 1    | 0.8 | 0.8 | 15.7 |
| <i>Rhodferax</i> (Proteobacteria)                                          | 0.8  | 1.4  | 0.8 | 0.8 | 16.5 |
| <i>Cyanobium</i> PCC-6307 (Cyanobacteria)                                  | 1.3  | 0.05 | 0.7 | 0.7 | 17.2 |
| <i>Streptococcus</i> (Firmicutes)                                          | 0.3  | 1    | 0.6 | 0.7 | 17.9 |
| <i>Allorhizobium-Neorhizobium-Pararhizobium-Rhizobium</i> (Proteobacteria) | 0.05 | 1.2  | 0.6 | 0.6 | 18.5 |
| <i>Luteolibacter</i> (Verrucomicrobiota)                                   | 1.3  | 0.1  | 0.6 | 0.6 | 19.1 |
| Cyanobacteria                                                              | 1.2  | 0.07 | 0.6 | 0.6 | 19.8 |
| <i>Novosphingobium</i> (Proteobacteria)                                    | 0.06 | 1.1  | 0.6 | 0.6 | 20.4 |
| <i>Cyanobium</i> PCC-6307 (Cyanobacteria)                                  | 1.2  | 0    | 0.6 | 0.6 | 21   |
| <i>Micrococcaceae</i> (Actinobacteriota)                                   | 0.7  | 0.4  | 0.6 | 0.6 | 21.5 |
| Winter Fresh – Spring Fresh (Overall Average Dissimilarity 98.4%)          |      |      |     |     |      |

| Taxa                                                | Winter Fresh (%) | Spring Fresh (%) | Average Dissimilarity | Contribution (%) | Cumulative (%) |
|-----------------------------------------------------|------------------|------------------|-----------------------|------------------|----------------|
| <i>Staphylococcus</i> (Firmicutes)                  | 7.3              | 0.2              | 3.7                   | 3.8              | 3.8            |
| <i>Planoglabratella opercularis</i> (Cyanobacteria) | 6.5              | 0.8              | 3.3                   | 3.4              | 7.1            |
| <i>Psychrobacter</i> (Proteobacteria)               | 5.03             | 0.03             | 2.5                   | 2.6              | 9.7            |
| <i>Staphylococcus</i> (Firmicutes)                  | 3.3              | 1.8              | 2.1                   | 2.2              | 11.8           |
| Oxalobacteraceae (Proteobacteria)                   | 0.005            | 3.6              | 1.8                   | 1.8              | 13.6           |

|                                                                            |       |      |     |     |      |
|----------------------------------------------------------------------------|-------|------|-----|-----|------|
| <i>Acinetobacter</i> (Proteobacteria)                                      | 3     | 0    | 1.5 | 1.5 | 15.2 |
| Gemmataceae (Planctomycetota)                                              | 1.9   | 1    | 1.3 | 1.3 | 16.5 |
| <i>Aquabacterium</i> (Proteobacteria)                                      | 0     | 2.5  | 1.3 | 1.3 | 17.7 |
| <i>Psychrobacter</i> (Proteobacteria)                                      | 1.9   | 0.02 | 1.0 | 1.0 | 18.7 |
| <i>Massilia</i> (Proteobacteria)                                           | 0     | 1.9  | 0.9 | 1.0 | 19.7 |
| <i>Massilia</i> (Proteobacteria)                                           | 0.04  | 1.6  | 0.8 | 0.8 | 20.5 |
| Cyanobacteria                                                              | 1.5   | 0    | 0.7 | 0.8 | 21.3 |
| <i>Rhodoferrax</i> (Proteobacteria)                                        | 0     | 1.4  | 0.7 | 0.7 | 22.0 |
| <i>Psychrobacter</i> (Proteobacteria)                                      | 1.4   | 0.07 | 0.7 | 0.7 | 22.7 |
| <i>Acinetobacter</i> (Proteobacteria)                                      | 1.4   | 0    | 0.7 | 0.7 | 23.4 |
| <i>Allorhizobium-Neorhizobium-Pararhizobium-Rhizobium</i> (Proteobacteria) | 0     | 1.2  | 0.6 | 0.6 | 24.0 |
| <i>Novosphingobium</i> (Proteobacteria)                                    | 0.003 | 1.1  | 0.6 | 0.6 | 24.6 |
| <i>Streptococcus</i> (Firmicutes)                                          | 0.04  | 1.04 | 0.5 | 0.5 | 25.2 |
| Cyanobacteria                                                              | 0     | 1.05 | 0.5 | 0.5 | 25.7 |
| <i>Psychrobacter</i> (Proteobacteria)                                      | 0     | 1.03 | 0.5 | 0.5 | 26.2 |

**Table S2.** Core water sample microbiomes defined as ASVs comprising at least 0.1% abundance and present in at least 50% of samples from the specified group.

| Phyla                        | Class               | Order           | Family        | Genus                 | Species |
|------------------------------|---------------------|-----------------|---------------|-----------------------|---------|
| Core Saline Water Microbiome |                     |                 |               |                       |         |
| Proteobacteria               | Gammaproteobacteria | Pseudomonadales | Moraxellaceae | <i>Psychrobacter</i>  |         |
| Proteobacteria               | Gammaproteobacteria | Vibrionales     | Vibrionaceae  | <i>Photobacterium</i> |         |

|               |                |                  |                  |                                                            |
|---------------|----------------|------------------|------------------|------------------------------------------------------------|
| Cyanobacteria | Cyanobacteriia | Cyanobacteriales | Nostocaceae      | <i>Rivularia</i> PCC-7116                                  |
| Cyanobacteria | Cyanobacteriia | Phormidesmiales  | Phormidesmiaceae | <i>Phormidesmis</i><br>ANT.LACV5.1                         |
| Cyanobacteria | Cyanobacteriia | Cyanobacteriales | Phormidiaceae    | <i>Tychonema</i> CCAP<br>1459-11B<br><i>Cyanobium</i> PCC- |
| Cyanobacteria | Cyanobacteriia | Synechococcales  | Cyanobiaceae     | 6307                                                       |

---

Core Freshwater Microbiome

---

N/A

---

Core Autumn Saline Microbiome

|                |                     |                  |                  |                                                  |
|----------------|---------------------|------------------|------------------|--------------------------------------------------|
| Proteobacteria | Gammaproteobacteria | Pseudomonadales  | Moraxellaceae    | <i>Psychrobacter</i>                             |
| Proteobacteria | Gammaproteobacteria | Vibrionales      | Vibrionaceae     | <i>Photobacterium</i>                            |
| Cyanobacteria  | Cyanobacteriia      | Cyanobacteriales | Nostocaceae      | <i>Rivularia</i> PCC-7116<br><i>Phormidesmis</i> |
| Cyanobacteria  | Cyanobacteriia      | Phormidesmiales  | Phormidesmiaceae | ANT.LACV5.1<br><i>Tychonema</i> CCAP             |
| Cyanobacteria  | Cyanobacteriia      | Cyanobacteriales | Phormidiaceae    | 1459-11B<br><i>Cyanobium</i> PCC-                |
| Cyanobacteria  | Cyanobacteriia      | Synechococcales  | Cyanobiaceae     | 6307                                             |

---

Core Autumn Fresh Microbiome

|                   |                     |                    |                     |                         |
|-------------------|---------------------|--------------------|---------------------|-------------------------|
| Proteobacteria    | Gammaproteobacteria | Burkholderiales    | Burkholderiaceae    | <i>Polynucleobacter</i> |
| Verrucomicrobiota | Verrucomicrobiae    | Chthoniobacterales | Chthoniobacteraceae | <i>Chthoniobacter</i>   |
| Planctomycetota   | Planctomycetes      | Gemmatales         | Gemmataceae         | <i>Cyanobium</i> PCC-   |
| Cyanobacteria     | Cyanobacteriia      | Synechococcales    | Cyanobiaceae        | 6307                    |

---

---

|                   |                     |                    |                 |                      |  |
|-------------------|---------------------|--------------------|-----------------|----------------------|--|
| Actinobacteriota  | Actinobacteria      | Frankiales         | Sporichthyaceae | hgcI clade           |  |
| Actinobacteriota  | Acidimicrobiia      |                    |                 |                      |  |
| Verrucomicrobiota | Verrucomicrobiae    | Verrucomicrobiales | Rubritaleaceae  | <i>Luteolibacter</i> |  |
| Proteobacteria    | Gammaproteobacteria | Burkholderiales    | Comamonadaceae  | <i>Rhodoferrax</i>   |  |

---

Core Winter Fresh Microbiome

---

|               |                |             |             |             |                         |
|---------------|----------------|-------------|-------------|-------------|-------------------------|
| Cyanobacteria | Cyanobacteriia | Chloroplast | Chloroplast | Chloroplast | <i>Planoglabratella</i> |
|               |                |             |             |             | <i>opercularis</i>      |

---

Core Spring Fresh Microbiome

---

|                |                     |                 |                |                    |  |
|----------------|---------------------|-----------------|----------------|--------------------|--|
| Proteobacteria | Gammaproteobacteria | Burkholderiales | Comamonadaceae | <i>Rhodoferrax</i> |  |
|----------------|---------------------|-----------------|----------------|--------------------|--|

---



## Supplemental Figures

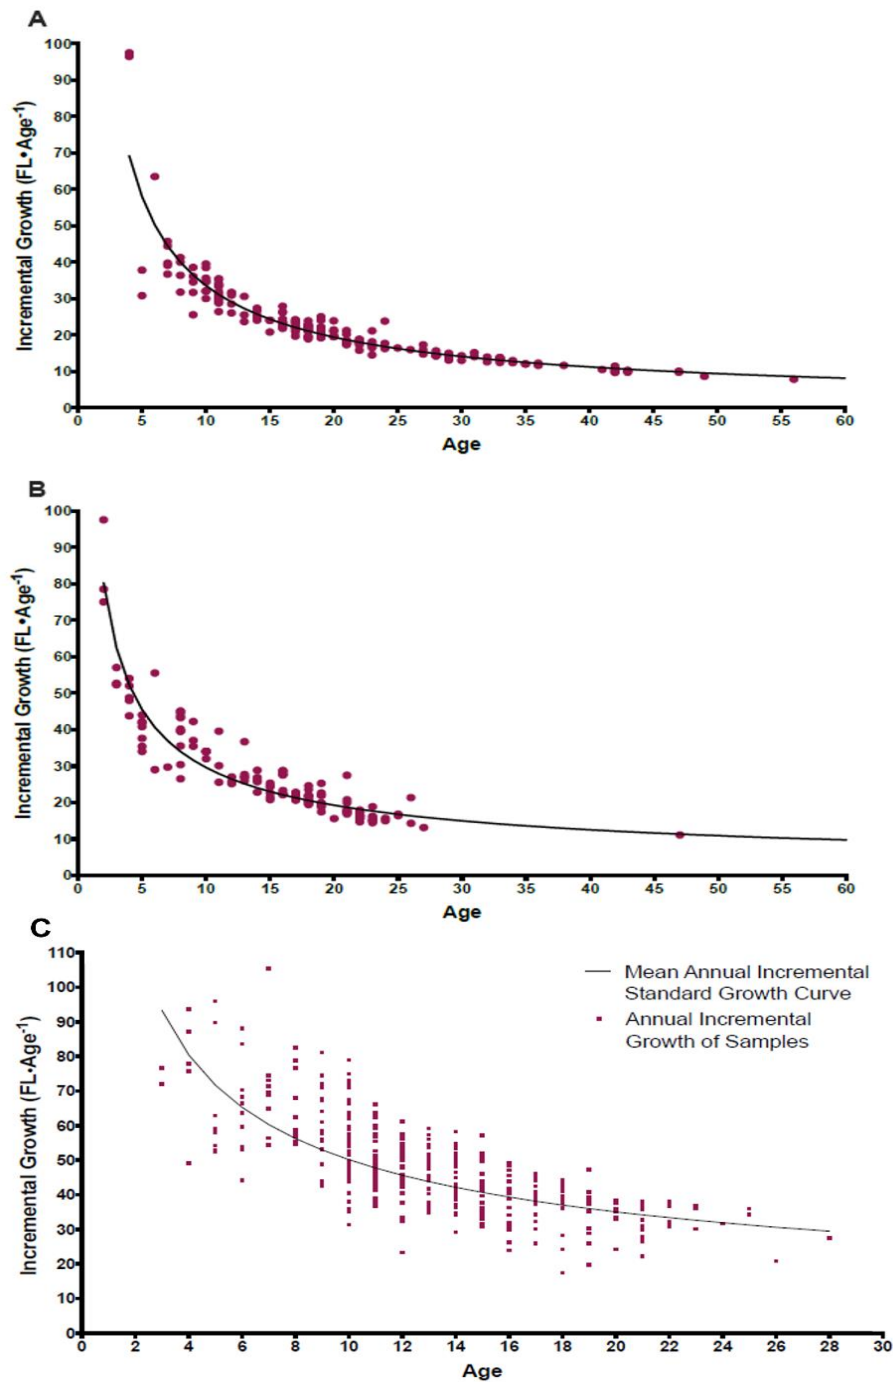

**Figure S1.** Annual incremental growth at age data against a growth standard curve for (A) lake whitefish using samples aged 4–43 (excluding outliers at ages 47, 49, and 56), (B) cisco using samples aged 2–27 (excluding outlier at ages 47), and (C) Arctic char samples aged 3–28. Note that the axes are adjusted for each salmonid type, individual data points are shown as dots, and that the data for lake whitefish and cisco (Hamilton et al., 2023) are presented here for convenience and comparison with the Arctic char growth standard curve.

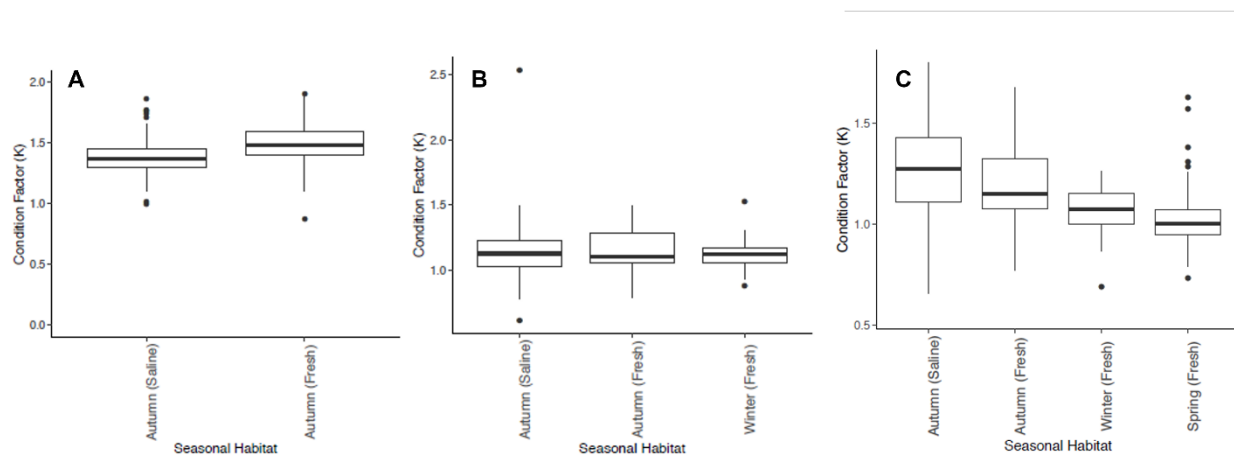

**Figure S2.** Condition factor (K) across seasonal habitats for (A) lake whitefish (B) cisco and (C) Arctic char. Note K data for lake whitefish and cisco (Hamilton et al., 2023) are presented here for comparison with the Arctic char K values.

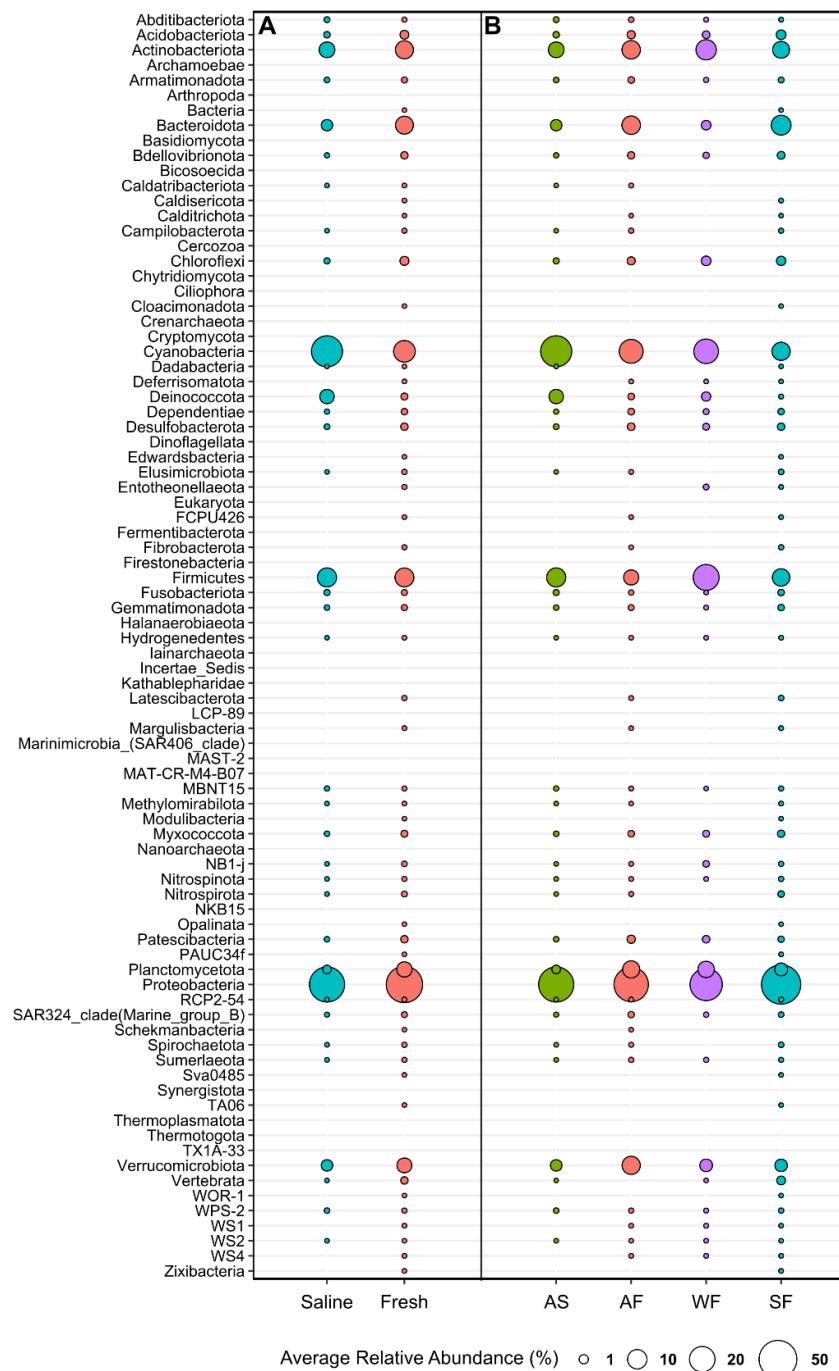

**Figure S3.** Bubble plots showing the average relative abundance of phyla in the skin microbiomes of Arctic char. **(A)** Phyla of saline water and freshwater caught fish. **(B)** Phyla of seasonal habitats in autumn saline (AS), autumn fresh (AF), winter fresh (WF), and spring fresh (SF) water.

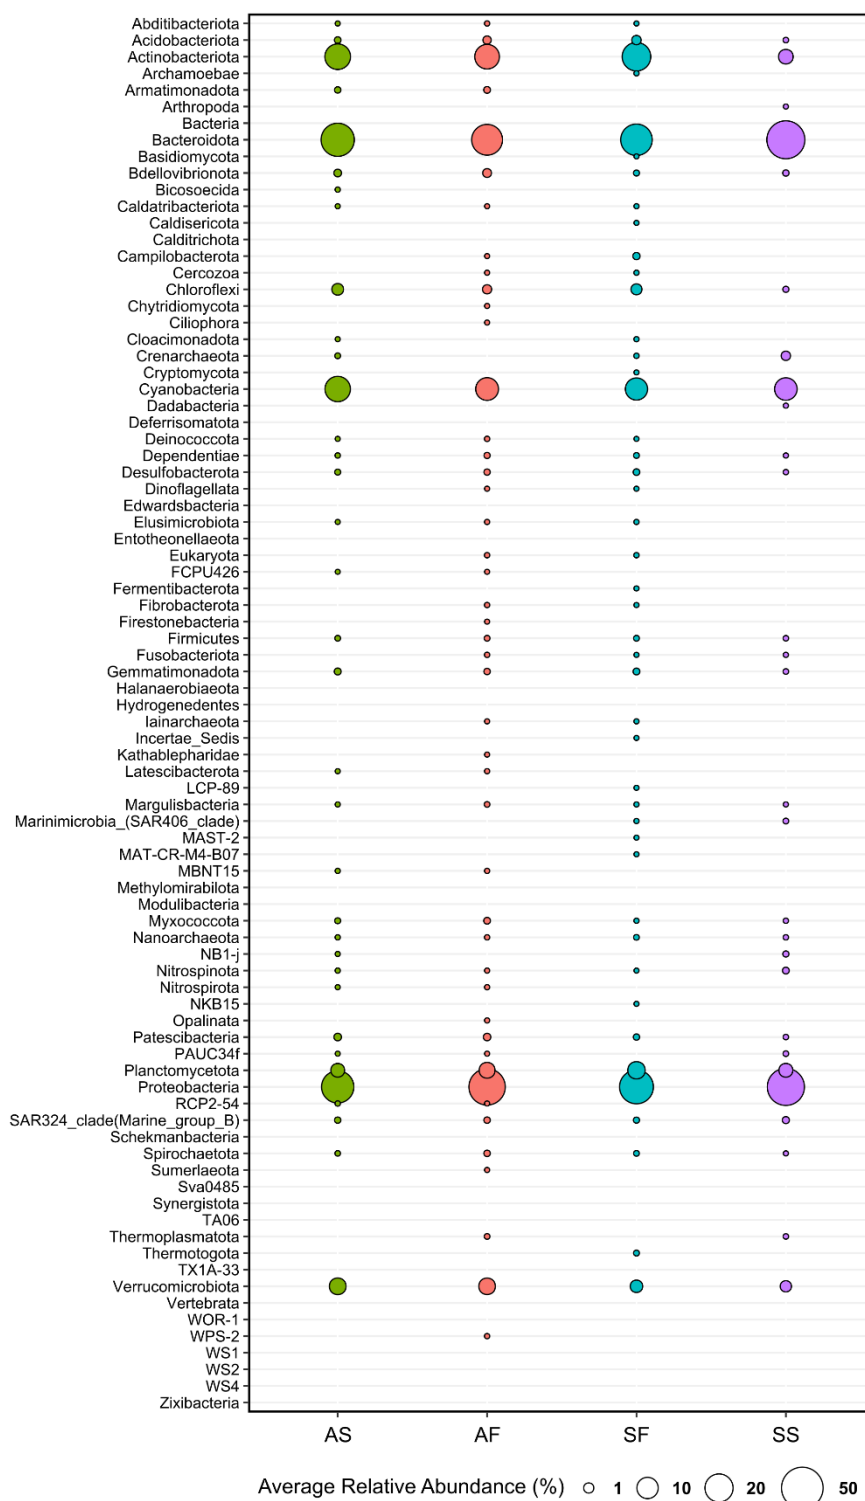

**Figure S4.** Bubble plots showing the average relative abundance of phyla in the water samples taken from autumn saline water (AS), autumn freshwater (AF), spring freshwater (SF), and spring saline water (SS).

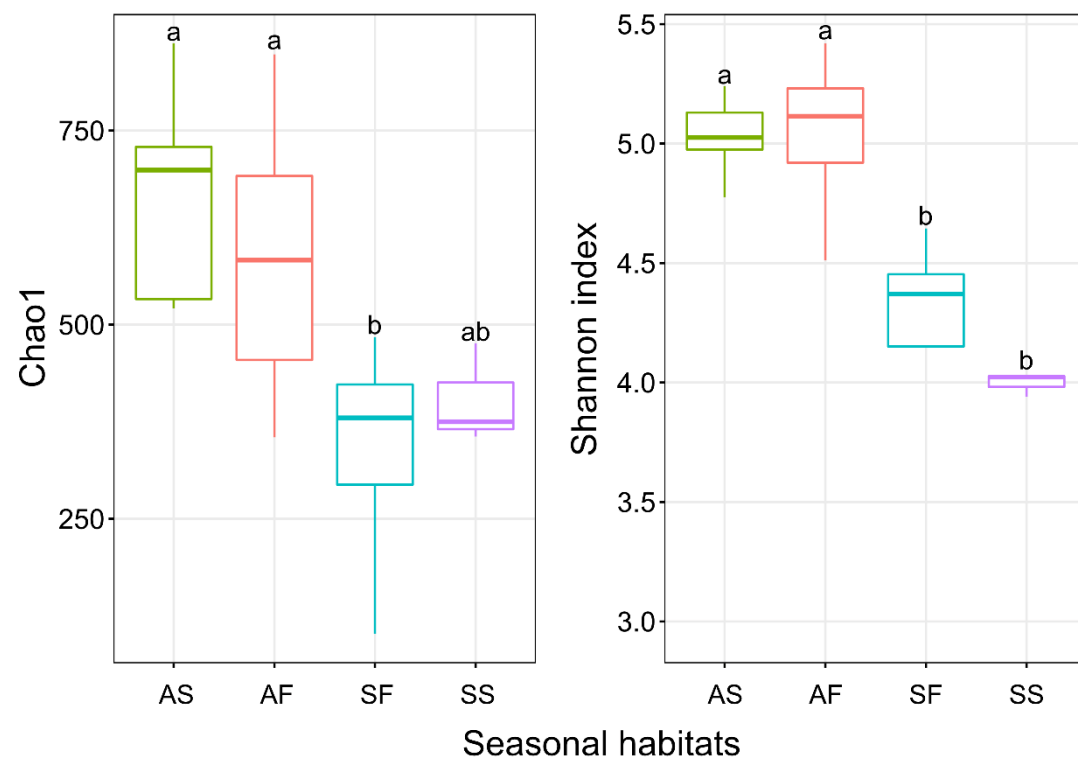

**Figure S5.** Alpha diversity metrics, Chao1 and Shannon diversity, measuring microbial community abundance and diversity, respectively, of water samples seasonal habitats autumn saline water (AS), autumn freshwater (AF), spring freshwater (SF), and spring saline water (SS). Lower case letters display significantly different ( $p < 0.001$ ) groupings as determined by one-way ANOVA.

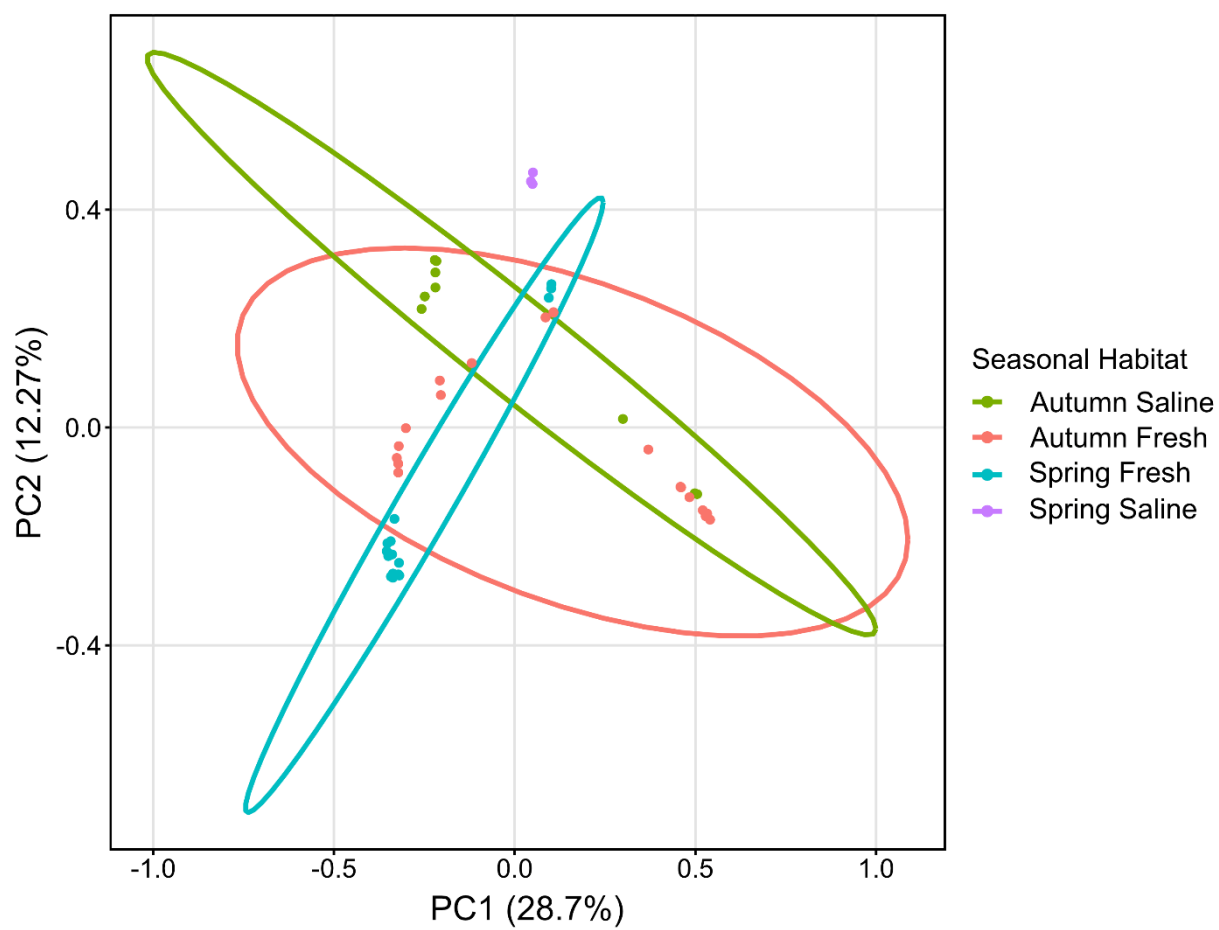

**Figure S6.** Principal coordinate analysis of water samples collected from different seasonal habitats (listed to the right of the graph) and showing water beta diversity using Bray-Curtis dissimilarity.
